# Supplementary material
Source: Springer Nature journal article supplement (https://www.springermedizin.de/resource/supplementary/12936_2009_1048_MOESM1_ESM.pdf/9548862)

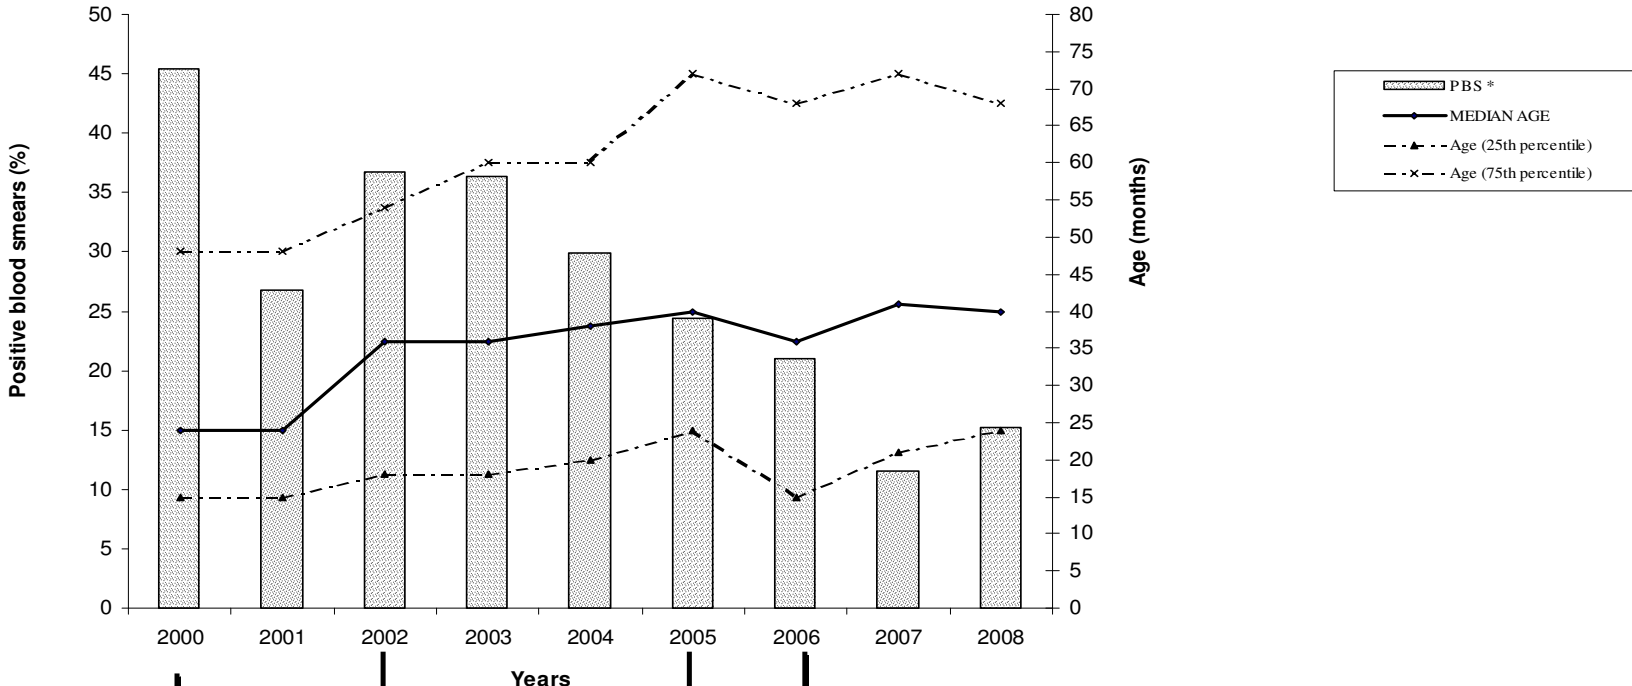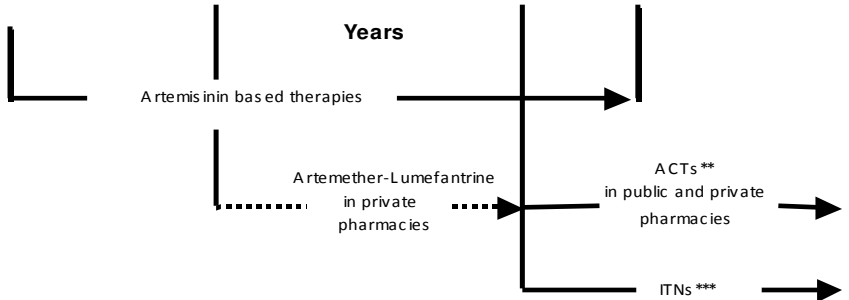

Supplement: MOESM1 [file 9548862]
